# Supplementary material for: Tandem repeats of the 5′ flanking region of human MUC5AC have a role as a novel enhancer in MUC5AC gene expression
Source: PubMed Central journal article supplement — Biochem Biophys Rep. 2019 Apr 4;18:100632. doi: 10.1016/j.bbrep.2019.100632 (PMC6449733; doi:10.1016/j.bbrep.2019.100632), 2019-04-04
Supplement: mmc2.pdf [file mmc2.pdf]

# UCSC Genome Browser on Human Feb. 2009 (GRCh37/hg19) Assembly

move <<< << < > >> >>> zoom in 1.5x 3x 10x base zoom out 1.5x 3x 10x 100x

chr11:1,147,617-1,151,626 4,010 bp.

chr11 (p15.5) hg19

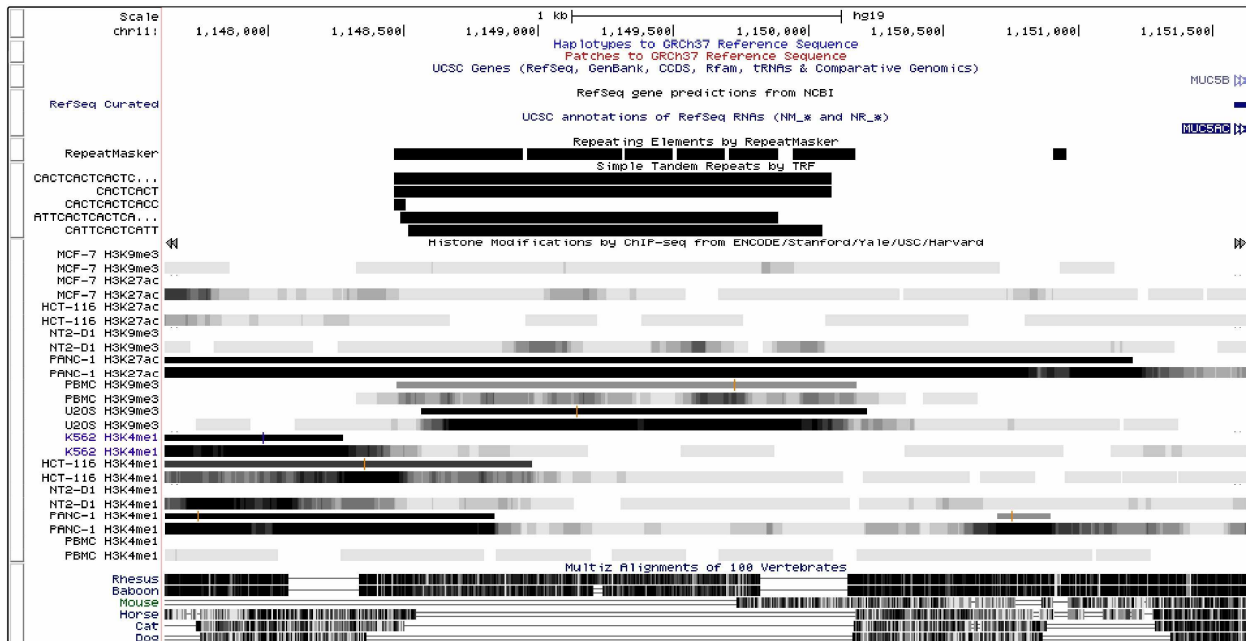

Supplement figure 1
